# Supplementary material
Source: HighWire-hosted journal article supplement (https://www.annfammed.org/highwire/filestream/8863/field_highwire_adjunct_files/0/Kiran_Supp_App.pdf)
Supplement: Kiran_Supp_App.pdf [file Kiran_Supp_App.pdf]

**Supplemental materials for:**

**Kiran T, Davie S, MacLeod P. Citizen engagement in primary care. *Ann Fam Med.* 2018;16(2):175.**

---

Tara Kiran, MD, MSc<sup>1,2,3</sup>

Sam Davie, MSc<sup>2</sup>

Peter MacLeod, MA<sup>4</sup>

<sup>1</sup>Centre for Urban Health Solutions, Li Ka Shing Knowledge Institute, St. Michael's Hospital, 30 Bond Street, Toronto, Ontario, Canada

<sup>2</sup>Department of Family and Community Medicine, St. Michael's Hospital, 30 Bond Street, Toronto, Ontario, Canada

<sup>3</sup>Department of Family and Community Medicine, University of Toronto, 500 University Avenue, Toronto, Ontario, Canada

<sup>4</sup>MASS LBP, 3A Gilead Place, Toronto, Ontario, Canada

**Supplemental Figure 1. Summary of areas for improvement and patient recommendations that SMHAFHT committed to advancing in the short-term.**

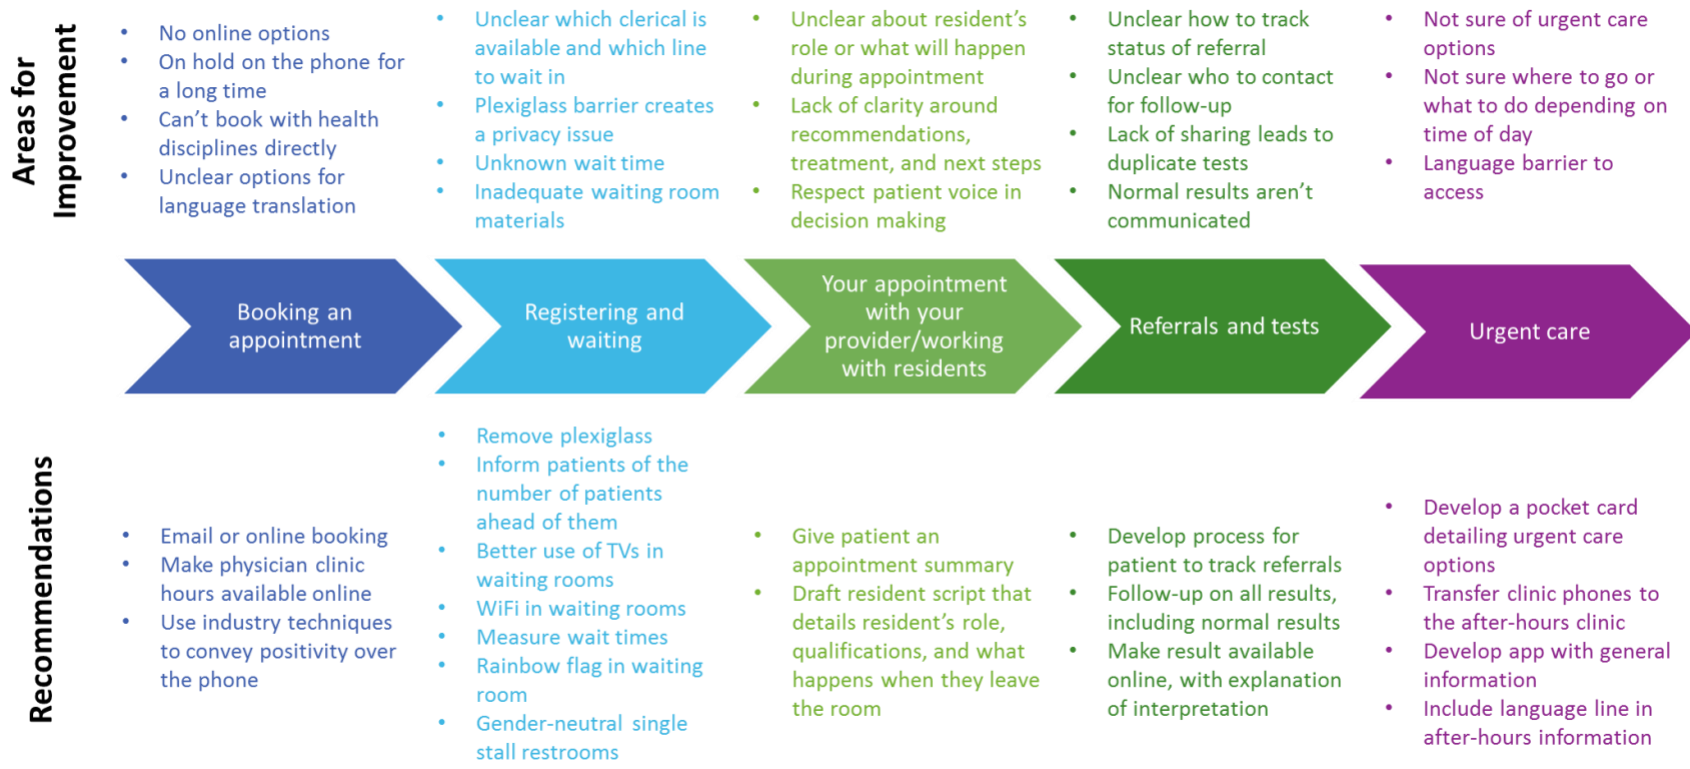

| <b>Supplemental Table 2. SMHAFHT's Progress on Advancing Patient Recommendations Approximately 18 Months Following the Patient Engagement Event</b> |                  |                                                                                                                                                                                                                                                                                                  |
|-----------------------------------------------------------------------------------------------------------------------------------------------------|------------------|--------------------------------------------------------------------------------------------------------------------------------------------------------------------------------------------------------------------------------------------------------------------------------------------------|
| <b>Recommendation</b>                                                                                                                               | <b>Status</b>    | <b>Progress to date</b>                                                                                                                                                                                                                                                                          |
| Adopt email and/or online booking of patient appointments                                                                                           | In progress      | Drafted guidance for staff on email communication and awaiting approval from privacy office. Exploring information technology options for enabling on-line booking.                                                                                                                              |
| Use industry techniques to convey positivity over the phone                                                                                         | Complete         | Phone centre staff underwent training and the phone system was re-organized to enhance customer service                                                                                                                                                                                          |
| Use waiting room TVs for patient education                                                                                                          | In progress      | Content drafted, with input from patients and communications staff                                                                                                                                                                                                                               |
| Advertise WiFi availability in waiting rooms                                                                                                        | Complete         | Signs placed in clinic waiting areas to tell patients how to log on                                                                                                                                                                                                                              |
| Inform patients at check-in of the number of patients ahead of them that are waiting to be seen by the physician                                    | In progress      | Two methods being tested at three clinic sites                                                                                                                                                                                                                                                   |
| Measure waiting room wait times                                                                                                                     | Complete         | Patients are asked about their experience with waiting in the waiting room in our monthly patient experience survey                                                                                                                                                                              |
| Remove plexiglass from the check-in area                                                                                                            | Partial progress | Glass removed at 2/5 clinics. Discussions underway about whether staff feel comfortable removing the glass at the other sites given staff concerns about personal safety.                                                                                                                        |
| Provide gender-neutral single stall restrooms                                                                                                       | Complete         | Gender-neutral restrooms available at each clinic                                                                                                                                                                                                                                                |
| Place rainbow flag in waiting room                                                                                                                  | Complete         | Placed posters in each clinic waiting room                                                                                                                                                                                                                                                       |
| Draft and adopt a script for resident physicians that details their role, qualifications, and what happens when they leave the room                 | In progress      | Developed poster and pamphlet detailing the role of resident physicians. Patient focus group and survey conducted to understand patients' awareness of resident roles. Residents and clerical staff directed to inform patients about resident roles and give patients a pamphlet as appropriate |
| Develop a process for patients to more easily track test and specialist referrals                                                                   | In progress      | Exploring potential information technology solutions                                                                                                                                                                                                                                             |
| Make test results available on-line, with explanation of interpretation                                                                             | In progress      | Working with hospital to pilot patient portal that enables viewing of tests results                                                                                                                                                                                                              |
| Develop a pocket card detailing urgent care options                                                                                                 | In progress      | Developed urgent care policy to standardize approach at all 6 clinic site for day-time access for urgent concerns. In the process of developing communications to inform patients                                                                                                                |
| Include information on the language line in after-hours promotional material                                                                        | In progress      | Phone centre staff to be trained on how to use language line                                                                                                                                                                                                                                     |
| Transfer clinic phones to the after-hours clinic                                                                                                    | Complete         | Phones are transferred to the appropriate urgent care clinic at the time of their call                                                                                                                                                                                                           |
